# Supplementary material for: Near-infrared optical transitions in PdSe2 phototransistors
Source: Royal Society of Chemistry journal article supplement (doi:10.1039/c9nr03505b), 2019-01-01
Supplement: c9nr03505b1.pdf [file c9nr03505b1.pdf]

## Near-Infrared Optical Transitions in PdSe<sub>2</sub> Phototransistors

*Thayer S. Walmsley<sup>1</sup>, Kraig Andrews<sup>2</sup>, Tianjiao Wang<sup>3</sup>, Amanda Haglund,<sup>4</sup> Upendra Rijal,<sup>2</sup> Arthur Bowman,<sup>2</sup> David Mandrus,<sup>4,5</sup> Zhixian Zhou<sup>\*,2</sup>, and Ya-Qiong Xu<sup>\*,1,3</sup>*

<sup>1</sup>Department of Physics and Astronomy, Vanderbilt University, Nashville, TN 37235, USA

<sup>2</sup>Department of Physics and Astronomy, Wayne State University, Detroit, MI 48201, USA

<sup>3</sup>Department of Electrical Engineering and Computer Science, Vanderbilt University, Nashville, TN 37235, USA

<sup>4</sup>Department of Materials Science and Engineering, University of Tennessee, Knoxville, TN 37235, USA

<sup>5</sup>Materials Science and Technology Division, Oak Ridge National Laboratory, Oak Ridge, TN 37831, USA

\*Correspondence to: [yaqiong.xu@vanderbilt.edu](mailto:yaqiong.xu@vanderbilt.edu) and [zxzhou@wayne.edu](mailto:zxzhou@wayne.edu)

## S1. Device Fabrication

Degenerately p-doped silicon substrate with 270 nm of thermally grown SiO<sub>2</sub> was first treated by oxygen plasma for 10 min to enhance hydrophilicity. Few-layer PdSe<sub>2</sub> flakes were produced by mechanical exfoliation from bulk grown crystals onto the substrates. Metal electrodes were then defined by electron beam lithography and the subsequent electron beam deposition of 5 nm of Ti covered by 45 nm of Au. Optical microscopy and Park-Systems XE-70 noncontact mode AFM were used to identify and characterize thin PdSe<sub>2</sub> flakes.

## S2. Schottky Barrier Height of PdSe<sub>2</sub> with Ti/Au Contacts

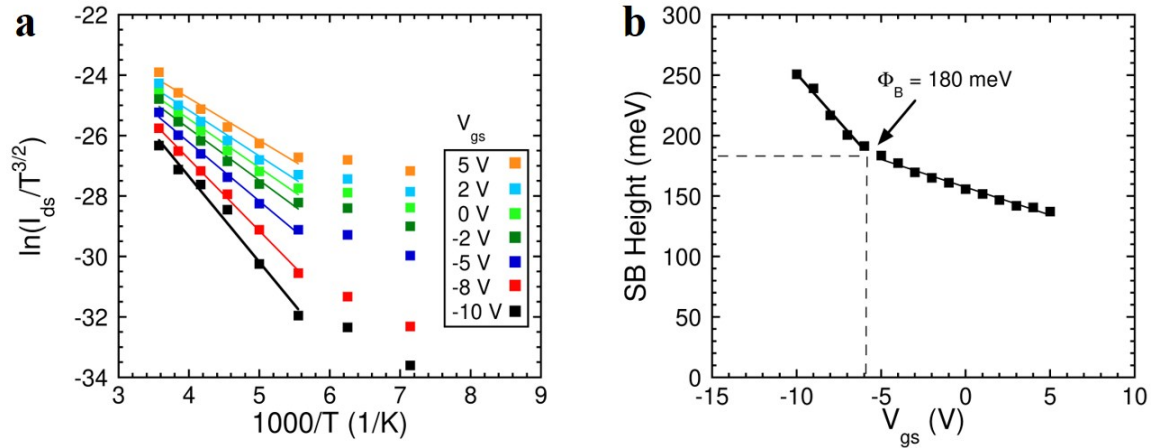

**Figure S1. Schottky barrier extraction.** (a) The Arrhenius plots for several back-gate bias voltages measured with drain voltage bias at 100 mV. The slope of each curve yields the effective Schottky barrier height at the corresponding gate bias. (b) The extracted effective Schottky barrier height at the various back-gate bias voltage, where the flat-band electron Schottky barrier height is measured to be 180 meV.

### S3. Scanning Photocurrent Measurement

Spatially-resolved scanning photocurrent measurements were executed using an Olympus microscope setup (BX51W). A linearly-polarized continuous wave laser beam (NKT Photonics SuperK Supercontinuum Laser) was expanded and focused by a  $40\times$  objective (N.A. = 0.6) into a diffraction - limited spot ( $\approx 1 \mu\text{m}$ ) on the devices. The position of the laser beam was changed by a nanometer-resolution scanning mirror. All experiments were performed in a Janis ST - 500 microscopy cryostat in a near zero-bias and high vacuum ( $\approx 10^{-6}$  Torr) environment.

### S4. Photocurrent Generation Mechanism

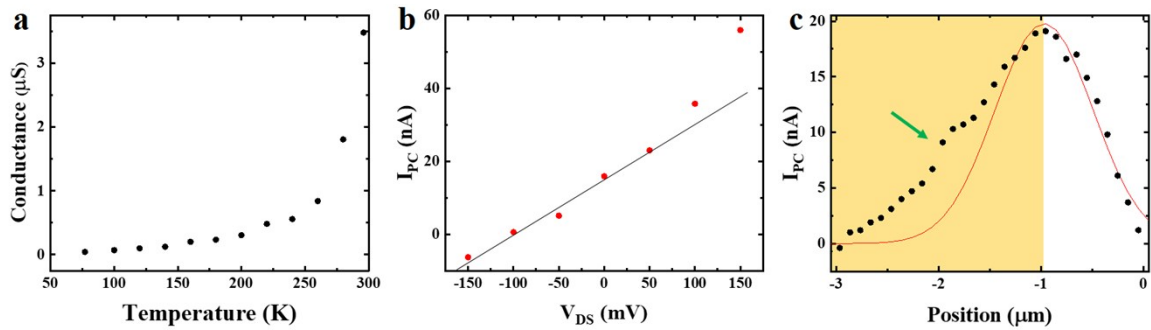

**Figure S2.** (a) Conductance of a  $\text{PdSe}_2$  device as a function of temperature; (b) photocurrent response of the device as a function of drain-source bias (red dots represent experimental data and black line is a linear fitting); and (c) a line profile of the photocurrent response across the metal- $\text{PdSe}_2$  junction is shown by the black dots. The red solid curve is the related Gaussian fitting. The green arrow denotes the photocurrent “tail” on the electrode. The orange background indicates the position of the electrode.
